# Supplementary material for: Ordered growth of Cs2AgBiBr6 double perovskites on PEIE-decorated SnO2 for efficient planar solar cells
Source: Royal Society of Chemistry journal article supplement (doi:10.1039/d4tc00219a), 2024-01-01
Supplement: d4tc00219a1.pdf [file d4tc00219a1.pdf]

## Supplementary information for

### Ordered growth of Cs<sub>2</sub>AgBiBr<sub>6</sub> double perovskite on PEIE-decorated SnO<sub>2</sub> for efficient planar solar cells

Wanjiang Wang<sup>a</sup>, Linsong Hou<sup>a</sup>, Haihua Hu<sup>b</sup>, Binbin Chang<sup>a</sup>, Yuqi Yuan<sup>a</sup>, Ping Lin<sup>a</sup>, Peng Wang<sup>a</sup>, Xiaoping Wu<sup>a</sup>, Xuegong Yu<sup>c</sup>, Lingbo Xu<sup>a, \*</sup>, and Can Cui<sup>a, \*</sup>

<sup>a</sup> Key Laboratory of Optical Field Manipulation of Zhejiang Province, Department of Physics, School of Science, Zhejiang Sci-Tech University, Hangzhou 310018, People's Republic of China

<sup>b</sup> Hangzhou City University, Hangzhou 310015, China

<sup>c</sup> State Key Laboratory of Silicon Materials, School of Materials Science and Engineering, Zhejiang University, Hangzhou 310027, People's Republic of China

\* Corresponding author. Email: xlb@zstu.edu.cn (L. Xu), cancui@zstu.edu.cn (C. Cui)

## 1 Experimental Section

### 1.1 Materials

Polyethylenimine, 80% ethoxylated solution (PEIE, 37 wt.% in water, average Mw~110000), 2-propanol (IPA, ≥99.5%), 4-tertbutylpyridine (4-TBP, ≥96%), acetonitrile (ACN, ≥99.8%) and dimethyl sulfoxide (DMSO, 99.9%) were purchased from Sigma-Aldrich. SnO<sub>2</sub> (colloidal dispersion, 15 % in H<sub>2</sub>O), AgBr (99.5 %) and BiBr<sub>3</sub> (99%) was obtained from Alfa Aesar. 2,2',7,7'-Tetraakis[N,N-di(4-methoxyphenyl) amino] -9,9'-spirobifluorene (Spiro-OMeTAD, ≥99.5%), LiTFSI (≥99.0%) and Co(III)TFSI (≥99.0%) and CsBr (99.9%) were purchased from Xi'an Polymer Light Technology Corporation. Chlorobenzene (CB, ≥99.5%), MoO<sub>3</sub>

( $\geq 99.9\%$ ), and hydrobromic acid (HBr, 48 wt. % in water) were purchased from Aladdin.

### **1.2 Preparation of $\text{Cs}_2\text{AgBiBr}_6$ powders**

Slight modifications were made according to the reported synthesis.<sup>1</sup> First, 852 mg of CsBr, 898 mg of  $\text{BiBr}_3$ , and 376 mg of AgBr were dissolved in 20 ml of HBr. The solution was stirred at 110 °C for 2 h and then cooled naturally to room temperature. The solution was poured out and the orange powder was removed and washed 3-5 times with ethanol. Finally, the powder was moved to a vacuum drying oven and dried at 70 °C overnight to obtain  $\text{Cs}_2\text{AgBiBr}_6$  crystal powder.

### **1.3 Preparation of $\text{Cs}_2\text{AgBiBr}_6$ films**

531 mg (0.5 mmol) of  $\text{Cs}_2\text{AgBiBr}_6$  powder was dissolved in 1 ml DMSO to formulate a 0.5 M precursor solution. The precursor must be stirred at 80 °C for over 3 h to ensure complete powder dissolution. The PEIE is diluted to different concentrations and named PEIE-x. For example, PEIE-0.2 means that the concentration of PEIE in solution is 0.2 mg/ml. The substrate was treated with ultraviolet- $\text{O}_3$  for 20 min before spin coating. The PEIE-x solution was spin-coated on the substrate at 4000 rpm for 30 s, then annealed at 100°C for 10min. Following ultraviolet- $\text{O}_3$  treatment for 15 min, they were transferred to an  $\text{N}_2$  glove box to prepare  $\text{Cs}_2\text{AgBiBr}_6$  films. The substrate and  $\text{Cs}_2\text{AgBiBr}_6$  precursor were preheated on a heating table at 80 °C for more than 10 min. The  $\text{Cs}_2\text{AgBiBr}_6$  precursor was spin-coated on the substrate at 2000 rpm for 60 s, and 250  $\mu\text{l}$  IPA was added dropwise as an anti-solvent 20 s before the end of the spin-coating process. After the spin coating, the thin films were annealed at 250 °C for 5

min.

#### **1.4 Fabrication of solar cell devices**

This work adopts the n-i-p planar solar cell structure based on SnO<sub>2</sub> as the electron transport layer. Firstly, the etched ITO glass was cleaned by ultrasonic cleaning with deionized water, ethanol, acetone, and isopropanol in sequence for 20 min, and treated with ultraviolet-O<sub>3</sub> for 20 min. Next, the SnO<sub>2</sub> precursor solution (The SnO<sub>2</sub> stock solution was dissolved with deionized water at a volume ratio of 1:4 and stirred at room temperature for 6 h to obtain the SnO<sub>2</sub> precursor) was spin-coated on ITO at 3000 rpm for 30 s, followed by annealing at 150 °C for 30 min. Then, the Cs<sub>2</sub>AgBiBr<sub>6</sub> absorber layer was prepared following procedure 1.3 after the films were treated with ultraviolet-O<sub>3</sub> for 20 min. Next, Spiro-OMeTAD solution was spin-coated onto the Cs<sub>2</sub>AgBiBr<sub>6</sub> film at 3000 rpm for 35 s. For Spiro-OMeTAD solution, the Spiro-OMeTAD (72.25 mg) was dissolved in 1 mL of chlorobenzene, 18.5 µl of TBP and 17.5 µl of 520 mg/mL Li-TFSI. Finally, 10 nm of MoO<sub>3</sub> and 100 nm of silver electrode were vaporized on the hole transport layer at 10<sup>-3</sup> Pa. The effective area of the device was controlled to 0.1 cm<sup>2</sup> by a mask plate.

#### **1.5 Characterizations**

Scanning electron microscope (SEM) images were taken on a Hitachi S4800 (Japan) using a 3 kV accelerating voltage. X-ray diffraction (XRD) patterns of perovskite films were examined by a Bruker D8 Advance diffractometer with Cu K $\alpha$  radiation ( $\lambda = 0.154056$  nm). The spectrophotometer measured the ultraviolet-visible (UV-vis) absorption spectra (UV-2600, Shimadzu). The steady-state

photoluminescence (PL) and time-resolved photoluminescence (TRPL) data were measured by the PL spectrometer (Fluotime300, PicoQuant). The excitation wavelength of PL and TRPL measurements is 375 nm. Raman spectra of Cs<sub>2</sub>AgBiBr<sub>6</sub> films were recorded by laser confocal microraman spectrometer; a diode-pumped solid-state laser with a wavelength of 532.0 nm was used as a source of excitation. The ultraviolet photoelectron spectroscopy (UPS) measurements were performed on an Axis supra (Kratos, Shimadzu). The photoelectrons from UPS were counted with a hemispherical analyzer with an overall resolution of 0.05 eV, as determined from the width of the Fermi step measured on a gold substrate cleaned by Ar-ion sputtering. All the UPS measurements of the onset of photoemission for determining the work function were done using standard procedures with a – 9.8 V bias applied to the sample. The current density-voltage (J-V) curves were measured by a Keithley 2400 source meter under the illumination of AM 1.5 G (100 mW/cm<sup>2</sup>) provided by a solar simulator (Zolix, SolarIV-1000A). The external quantum efficiency (EQE) was measured in the wavelength range of 300-850 nm, using an EQE measurement system (Model QEX10, PV Measurements). Electrochemical impedance spectroscopy (EIS) was measured by an electrochemical workstation (VersaSTAT 4, Princeton Applied Research) in the dark with a frequency ranging from 1 Hz to 1 MHz.

## 2 Figures

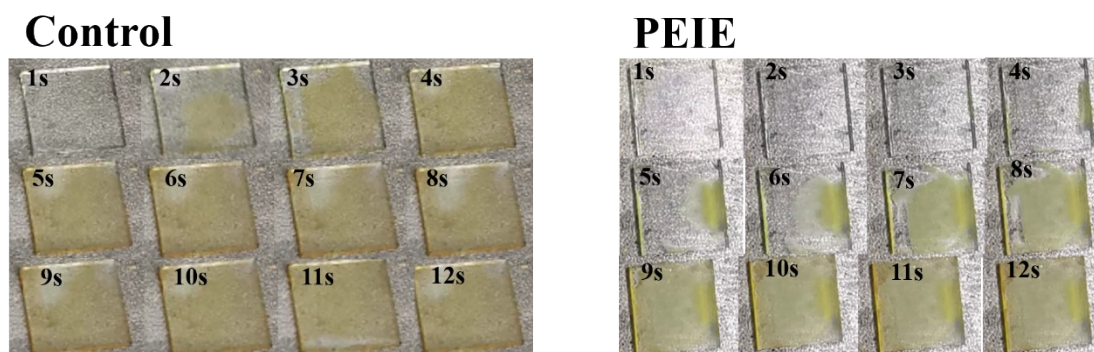

**Fig. S1.** Color conversions of  $\text{Cs}_2\text{AgBiBr}_6$  films on different substrates during thermal treatment.

Each image is taken at an interval of 1 second.

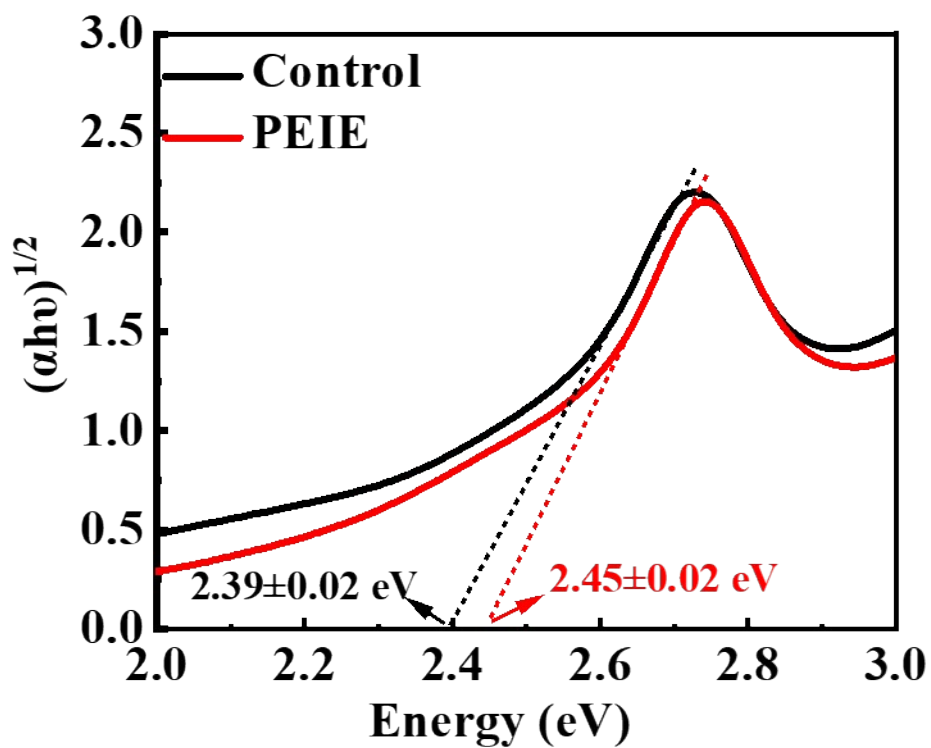

**Fig. S2.** Tauc plots of  $\text{Cs}_2\text{AgBiBr}_6$  films on different substrates.

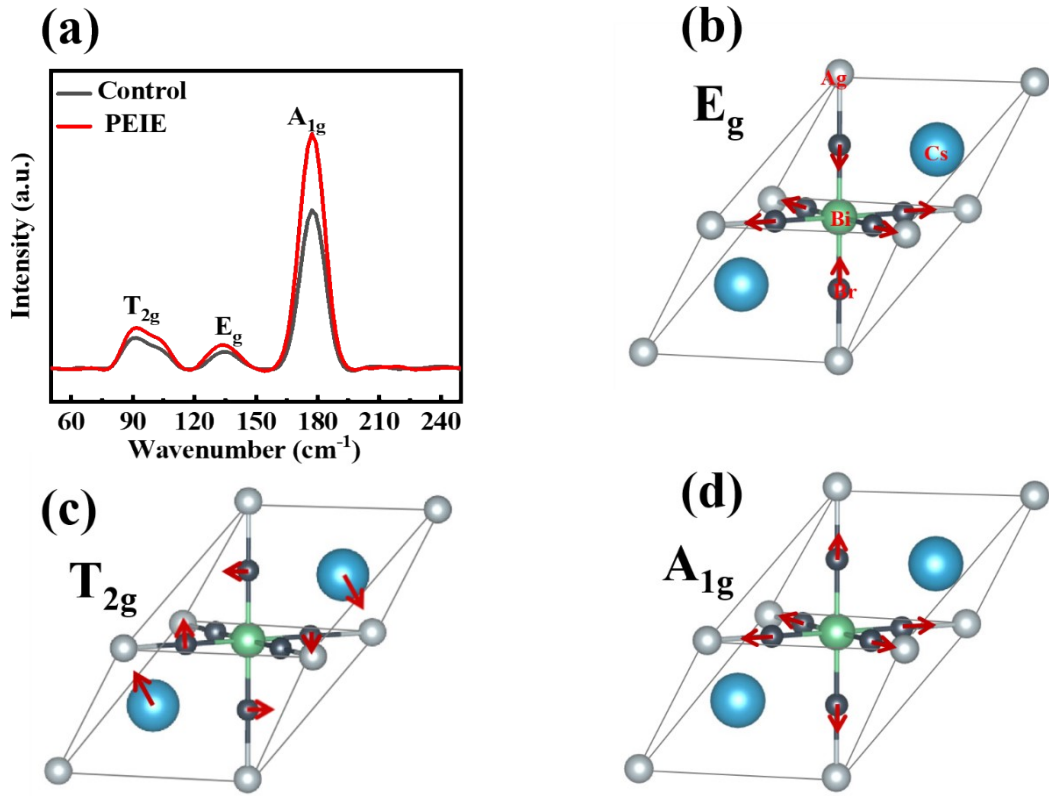

**Fig. S3.** (a) Raman spectra of  $\text{Cs}_2\text{AgBiBr}_6$  films on different substrates. The Raman spectra of  $\text{Cs}_2\text{AgBiBr}_6$  consist three peaks at  $74\text{ cm}^{-1}$ ,  $139\text{ cm}^{-1}$ , and  $180\text{ cm}^{-1}$ , which correspond to  $T_{2g}$  mode,  $E_g$  mode, and  $A_{1g}$  mode, respectively<sup>2,3</sup>. The schematic diagrams of these modes are shown in **Fig. S3 (b-d)**. The  $E_g$  mode is due to the asymmetric stretching around the Bi atom. The  $T_{2g}$  mode is related to the shear motion of Cs atoms around the Br. The  $A_{1g}$  longitudinal optical (LO) phonon mode is related to the symmetric stretching vibration of the Bi atoms around the Br atom in the octahedron.

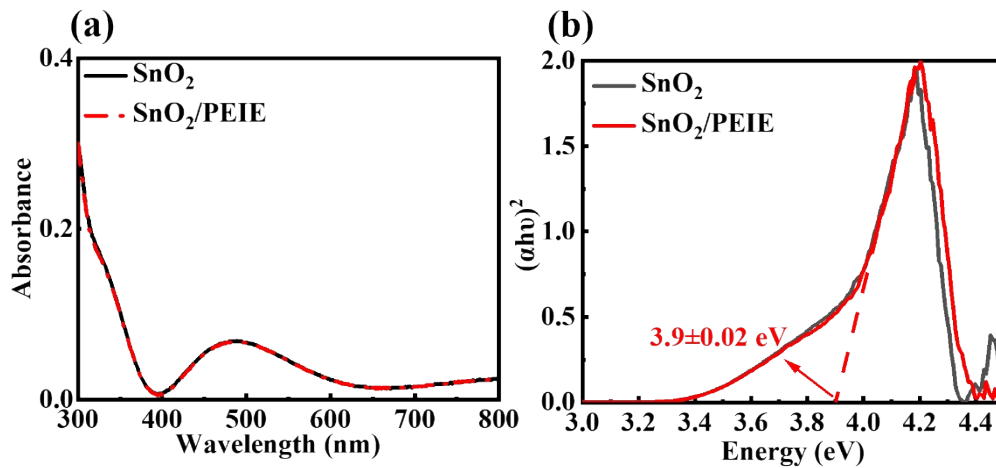

**Fig. S4.** (a) UV-vis absorption spectra of SnO<sub>2</sub> and SnO<sub>2</sub>/PEIE films. (b) Tauc plots of SnO<sub>2</sub> and SnO<sub>2</sub>/PEIE films.

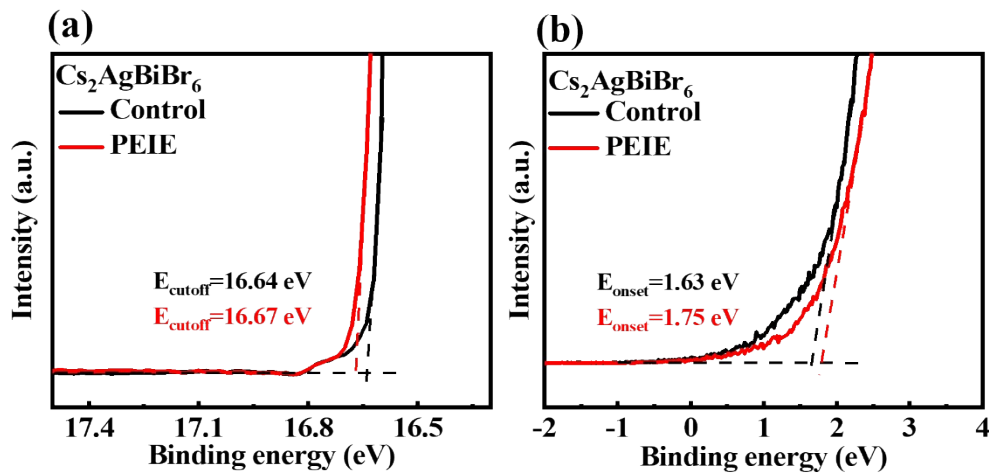

**Fig. S5.** Secondary electron cutoff regions (a) and onset regions (b) of UPS spectra for Cs<sub>2</sub>AgBiBr<sub>6</sub> films on different substrates.

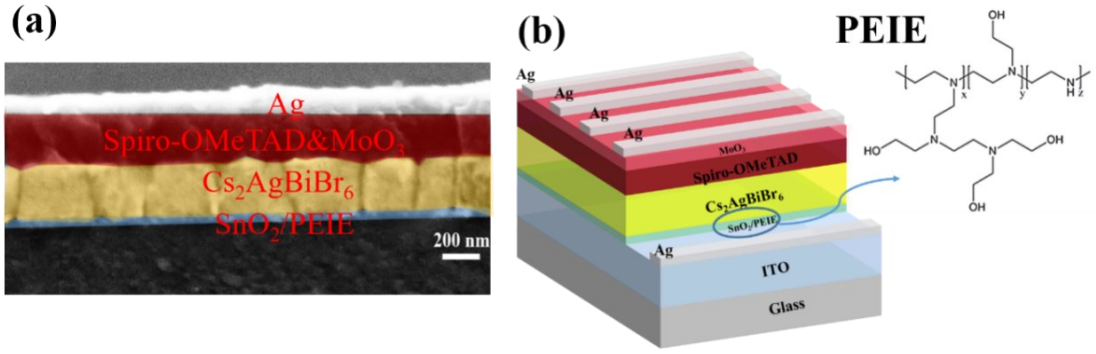

Fig. S6. (a) The cross-sectional SEM and (b) schematic structure of  $\text{Cs}_2\text{AgBiBr}_6$  PSCs.

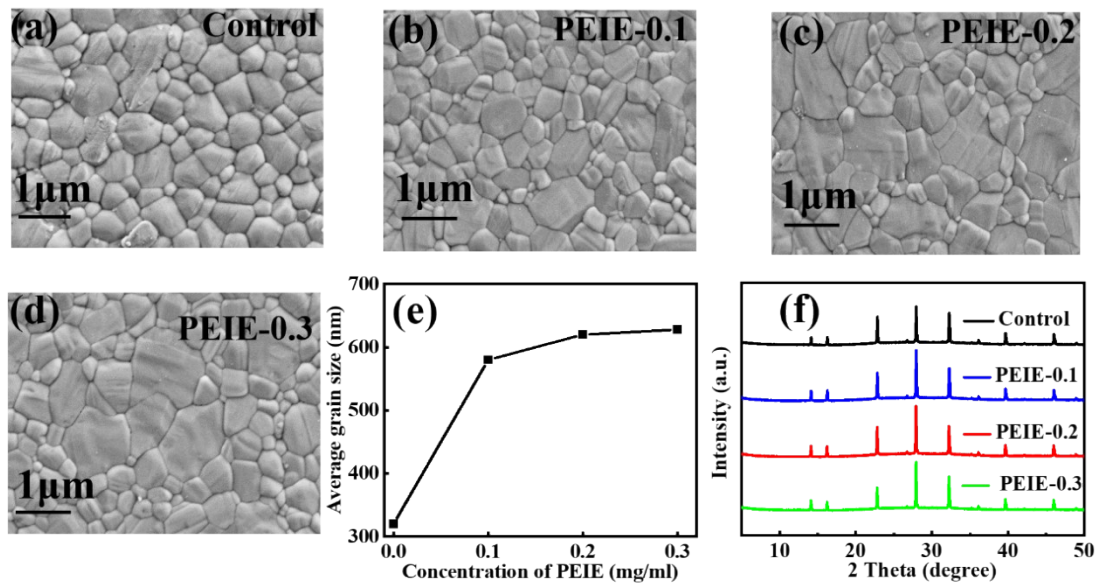

Fig. S7. (a-d) Top-view SEM images of  $\text{Cs}_2\text{AgBiBr}_6$  films deposited on substrates with different PEIE concentrations. (e) Average grain size of  $\text{Cs}_2\text{AgBiBr}_6$  films on different substrates. (f) XRD patterns of  $\text{Cs}_2\text{AgBiBr}_6$  films on different substrates.

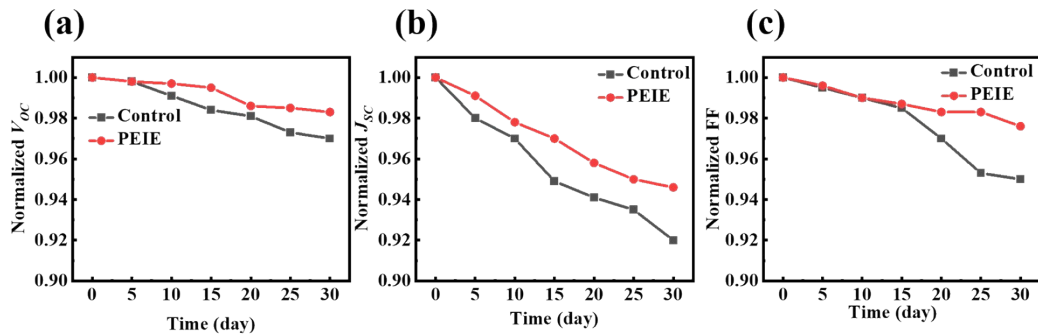

Fig. S8. Long-term stability test of (a)  $V_{oc}$ , (b)  $J_{sc}$ , and (c) FF (temperature: 20~30 °C, 20~30 % relative humidity).



### 3 Tables

**Table S1.** Fitting parameters for TRPL measurements of Cs<sub>2</sub>AgBiBr<sub>6</sub> films deposited on different substrates.

| Sample                                                     | $\tau$ (ns) | $\beta$ | $\langle\tau\rangle$ (ns) |
|------------------------------------------------------------|-------------|---------|---------------------------|
| Glass/Cs <sub>2</sub> AgBiBr <sub>6</sub>                  | 4.21        | 0.40    | 13.51                     |
| SnO <sub>2</sub> /Cs <sub>2</sub> AgBiBr <sub>6</sub>      | 1.88        | 0.49    | 3.84                      |
| SnO <sub>2</sub> /PEIE/Cs <sub>2</sub> AgBiBr <sub>6</sub> | 0.36        | 0.40    | 1.19                      |

### 4 Methods of analysis

#### 4.1 TRPL analysis

The decay traces are fitted with a stretched-exponential function in the form of <sup>4, 5</sup>:

$$I(t) = I_0 e^{-(t/\tau)^\beta} \quad (\text{Eq. S1})$$

where  $I(t)$  is the luminescence intensity changing with time,  $I_0$  is the initial luminescence intensity,  $\tau$  is the time taken for luminescence intensity to decrease to  $1/e$  of  $I_0$ , and  $\beta$  is the distribution coefficient. The formula of average carrier lifetime  $\langle\tau\rangle$  is

$$\langle\tau\rangle = \frac{\tau}{\beta} \Gamma\left(\frac{1}{\beta}\right) \quad (\text{Eq. S2})$$

#### 4.2 SCLC analysis

In the SCLC test, the linear relation of J-V curve in low voltage range is ohmic region.

As the voltage continues to increase, the current density rises sharply and the J-V curve deviates from linear relationship, which goes into the trap filling limit (TFL) region.

Once all the traps are filled by the carriers, the J-V curve turns into a quadratic relationship, which is trap-free region. The trap filling limit voltage ( $V_{TFL}$ ) is defined

as the voltage at the intersection of two fitting lines in the ohmic region and the TFL region. The defect density of states of Cs<sub>2</sub>AgBiBr<sub>6</sub> films can be calculated by the following equation<sup>6</sup>:

$$N_t = \frac{2\varepsilon\varepsilon_0V_{TFL}}{eL^2} \quad (\text{Eq. S3})$$

where  $N_t$  is the defect density,  $e$  is the electronic charge,  $L$  is the thickness of Cs<sub>2</sub>AgBiBr<sub>6</sub>,  $V_{TFL}$  is the limit voltage of defect filling,  $\varepsilon$  represents the relative permittivity of Cs<sub>2</sub>AgBiBr<sub>6</sub>,  $\varepsilon_0$  represents the vacuum permittivity.

The charge mobility ( $\mu$ ) could be calculated from the trap-free region of the SCLC curve using the Mott-Gurney law with the following equation<sup>7</sup>:

$$\mu = \frac{8JL^3}{9\varepsilon_0\varepsilon V^2} \quad (\text{Eq. S4})$$

where  $\mu$ ,  $J$ ,  $L$ ,  $\varepsilon_0$ ,  $\varepsilon$ , and  $V$  is the charge mobility, current density, thickness of the Cs<sub>2</sub>AgBiBr<sub>6</sub> film, vacuum permittivity, relative permittivity of Cs<sub>2</sub>AgBiBr<sub>6</sub>, and voltage, respectively.

### 4.3 Mott-Schottky analysis

The built-in potential ( $V_{bi}$ ) can be extracted from the capacitance-voltage measurement with the Mott-Schottky equation<sup>8</sup>:

$$C^2 = \frac{2(V_{bi} - V)}{\varepsilon_0\varepsilon eNA^2} \quad (\text{Eq. S5})$$

where  $C$ ,  $V_{bi}$ ,  $V$ ,  $\varepsilon_0$ ,  $\varepsilon$ ,  $e$ ,  $N$ , and  $A$  is the capacitance, built-in potential, applied bias, vacuum permittivity, relative permittivity of Cs<sub>2</sub>AgBiBr<sub>6</sub>, elementary charge, carrier density, and active area of PSC, respectively.

## References

1. F. Igbari, R. Wang, Z.-K. Wang, X.-J. Ma, Q. Wang, K.-L. Wang, Y. Zhang, L.-S. Liao and Y. Yang, *Nano Lett.*, 2019, **19**, 2066-2073.
2. P. Pistor, M. Meyns, M. Guc, H.-C. Wang, M. A. L. Marques, X. Alcobé, A. Cabot and V. Izquierdo-Roca, *Scr. Mater.*, 2020, **184**, 24-29.
3. S. J. Zelewski, J. M. Urban, A. Surrente, D. K. Maude, A. Kuc, L. Schade, R. D. Johnson, M. Dollmann, P. K. Nayak, H. J. Snaith, P. Radaelli, R. Kudrawiec, R. J. Nicholas, P. Plochocka and M. Baranowski, *J. Mater. Chem. C*, 2019, **7**, 8350-8356.
4. L. Zhang, B. Han, Z. Liu, Y. Yao, L. Xu, P. Wang, P. Lin, X. Wu, X. Yu and C. Cui, *J. Alloys Compd.*, 2022, **911**, 164972.
5. L. Xu, Y. Qiang, K. Xiao, Y. Zhang, J. Xie, C. Cui, P. Lin, P. Wang, X. Yu, F. Wu and D. Yang, *Appl. Phys. Lett.*, 2017, **110**, 233113.
6. H. Wang, S. Cao, B. Yang, H. Li, M. Wang, X. Hu, K. Sun and Z. Zang, *Sol. RRL.*, 2020, **4**, 1900363.
7. J. Dou, C. Zhu, H. Wang, Y. Han, S. Ma, X. Niu, N. Li, C. Shi, Z. Qiu, H. Zhou, Y. Bai and Q. Chen, *Adv. Mater.*, 2021, **33**, 2102947.
8. J. Qiu, Q. Zhou, D. Jia, Y. Wang, S. Li and X. Zhang, *J. Mater. Chem. A*, 2022, **10**, 1821-1830.
